# Supplementary material for: Room-temperature growth of ferroelectric diisopropylammonium bromide with 12-crown-4 addition
Source: Royal Society of Chemistry journal article supplement (doi:10.1039/c4ce02567a), 2015-01-01
Supplement: c4ce02567a1.pdf [file c4ce02567a1.pdf]

Supporting Information for Publication

**Room-temperature growth of ferroelectric  
Diisopropylammonium Bromide with 12-crown-4 addition**

Kaige Gao, Chuang Liu, Zepeng Cui, Jiansheng Zhu, Hong-Ling Cai\* and X.S. Wu\*

Collaborative Innovation Center of Advanced Microstructures, Lab of Solid State Microstructures and  
School of Physics, Nanjing University, Nanjing 210093, P. R. China

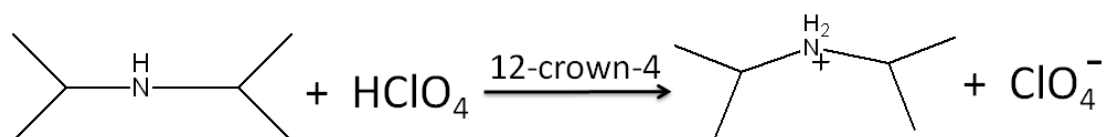

Scheme 1.

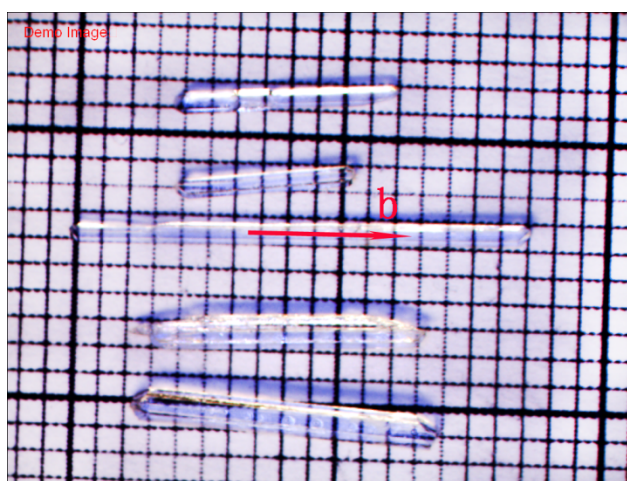

Figure S1. The morphology of DIPAB obtained with 12-crown-4 addition. The red arrow is the crystal growth direction of b axis. Needle-like transparent crystals with diameter of about 1 mm and the largest length of 17 mm can be seen in the figure.

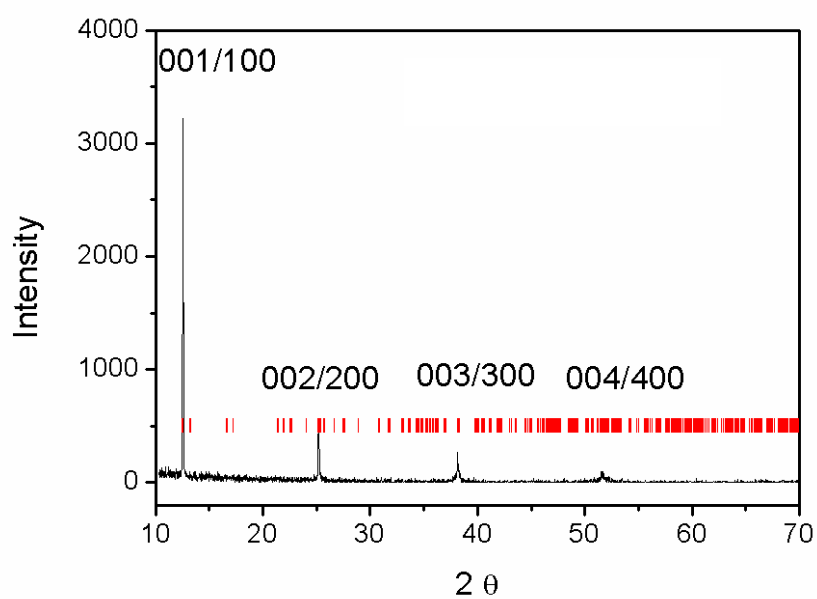

Figure S2. XRD of one crystallographic plane shows the plane to be (0 0 1) or (1 0 0) plane.

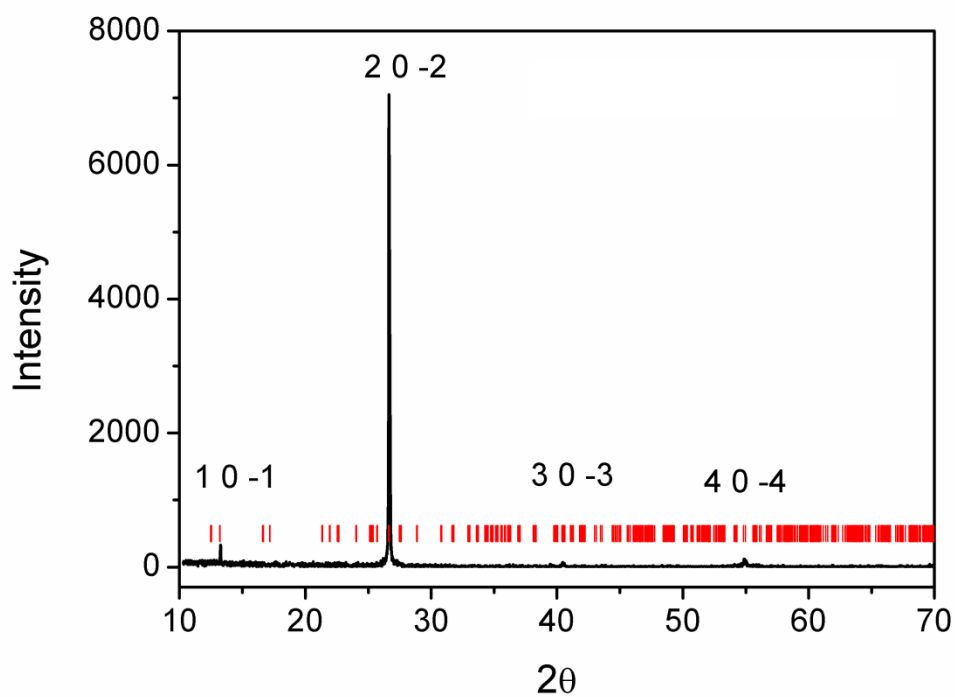

Figure S3. XRD of one crystallographic plane shows the plane to be (1 0 -1).

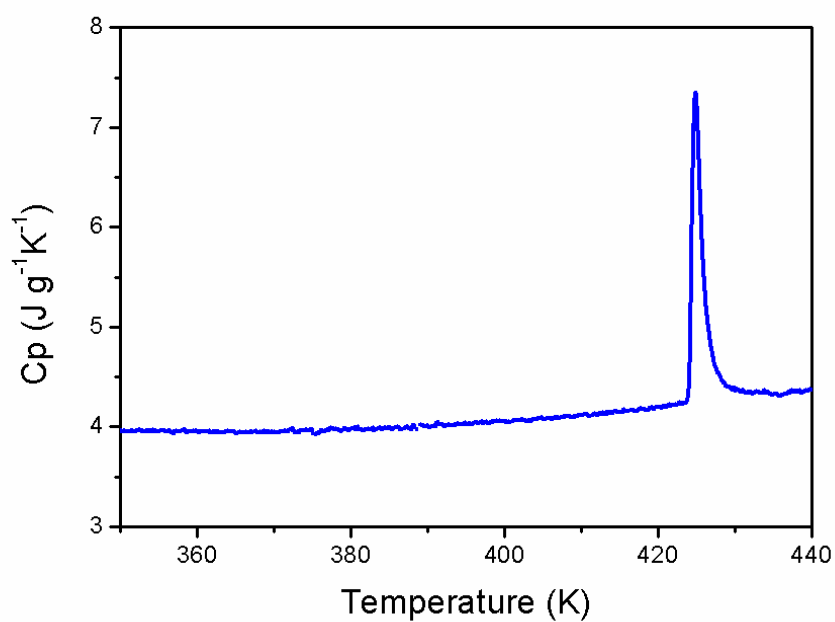

Figure S4. Specific heat capacity of the obtained DIPAB.

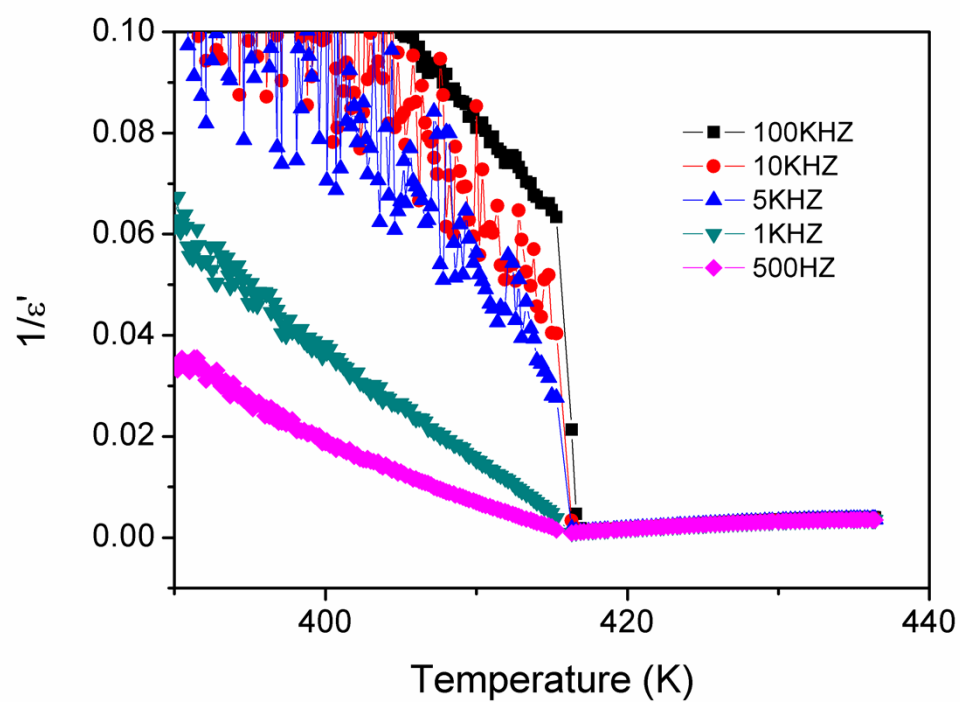

Figure S5.  $1/\epsilon'$  across the Curie point at different frequencies.
